# Supplementary material
Source: publisher site journal article supplement (https://www.dovepress.com/article/245365)
Supplement: Supplementary file 1 [file get_supplementary_file.php]

**Appendix 1. Search strategy**

**MEDLINE (Ovid)**

**# Searches**

1 exp Hyperlipidemias/

2 (hyperlip$ or lipid?emia$ or lipemia$).tw,kf.

3 hypercholester$.tw,kf.

4 or/1-3

5 exp Hypolipidemic Agents/

6 (antihyperlipid?emic$ or hypolipid?emic$ or antilipemic$).tw,kf.

7 (anticholesteremic$ or hypocholesteremic$ or cholesterol$).tw,kf.

8 (hydroxymethylglutaryl$ or hmg-coa$ or statin$).tw,kf.

9 lipotropic$.tw,kf.

10 ("fatty acid$" adj3 inhibitor$).tw,kf.

11 clofibric acid$.tw,kf.

12 clofibrate$.tw,kf.

13 bezafibrate$.tw,kf.

14 butoxamine$.tw,kf.

15 clofenapate$.tw,kf.

16 colestipol$.tw,kf.

17 fenofibrate$.tw,kf.

18 gemfibrozil$.tw,kf.

19 halofenate$.tw,kf.

20 meglutol$.tw,kf.

21 nafenopin$.tw,kf.

22 niacin$.tw,kf.

23 niceritrol$.tw,kf.

24 pyridinolcarbamate$.tw,kf.

25 simvastatin$.tw,kf.

26 triparanol$.tw,kf.

27 atorvastatin calcium$.tw,kf.

28 azacosterol$.tw,kf.

29 diazacholesterol$.tw,kf.

30 chitosan$.tw,kf.

31 cholestyramine resin$.tw,kf.

32 colesevelam hydrochloride$.tw,kf.

33 ezetimibe$.tw,kf.

34 trans-1,4-Bis$.tw,kf.

35 lovastatin$.tw,kf.

36 pravastatin$.tw,kf.

37 probucol$.tw,kf.

38 rosuvastatin$.tw,kf.

39 cerulenin$.tw,kf.

40 ethionamide$.tw,kf.

41 isoniazid$.tw,kf.

42 triclosan$.tw,kf.

43 betaine$.tw,kf.

44 choline$.tw,kf.

45 Fluvastatin/

46 fluvastatin$.tw,kf.

47 pitavastatin$.tw,kf.

48 or/5-47

49 4 or 48

50 Patient Compliance/ or Medication Adherence/

51 (compliance$ or noncompliance$ or adherence$ or nonadherence$ or concordance$ or nonconcordance$ or persistence$ or discontinu$).tw,kf.

52 50 or 51

53 49 and 52

54 exp animals/ not humans/

55 53 not 54

56 limit 55 to systematic reviews pre 2019

**Appendix 2. List of excluded reviews**

| **Reference** | **Reason for exclusion** |
| --- | --- |
| Al Alshaikh S, Quinn T, Dunn W, Walters M, Dawson J. Multimodal Interventions to Enhance Adherence to Secondary Preventive Medication after Stroke: A Systematic Review and Meta-Analyses. *Cardiovasc Ther*. 2016;34(2):85-93. doi:10.1111/1755-5922.12176 | Intervention |
| Awad K, Banach M. The optimal time of day for statin administration. *Curr Opin Lipidol*. 2018;29(4):340-345. doi:10.1097/mol.0000000000000524 | No adherence-affecting factor |
| Awad K, Mikhailidis DP, Toth PP, et al. Efficacy and Safety of Alternate-Day Versus Daily Dosing of Statins: a Systematic Review and Meta-Analysis. *Cardiovasc Drugs Ther*. 2017;31(4):419-431. doi:10.1007/s10557-017-6743-0 | No adherence-affecting factor |
| Becker DM, Allen JK. Improving compliance in your dyslipidemic patient: an evidence-based approach. *J Am Acad Nurse Pract*. 2001;13(5):200-207 8p. doi:10.1111/j.1745-7599.2001.tb00021.x | Not a review |
| Brunham LR, Baker S, Mammen A, Mancini GBJ, Rosenson RS. Role of genetics in the prediction of statin-Associated muscle symptoms and optimization of statin use and adherence. *Cardiovasc Res*. 2018;114(8):1073-1081. doi:10.1093/cvr/cvy119 | Not a review |
| Bytyçi I, Bajraktari G, Bhatt DL, et al. Hydrophilic vs lipophilic statins in coronary artery disease: A meta-analysis of randomized controlled trials. *J Clin Lipidol*. 2017;11:624-637. doi:10.1016/j.jacl.2017.03.003 | No adherence-affecting factor |
| Chan DKY, O’Rourke F, Shen Q, Mak JCS, Hung WT. Meta-analysis of the cardiovascular benefits of intensive lipid lowering with statins. *Acta Neurol Scand*. 2011;124(3):188-195. doi:10.1111/j.1600-0404.2010.01450.x | Intervention |
| Charan J, Goyal JP, Saxena D. Effect of Pollypill on cardiovascular parameters: Systematic review and meta-analysis. *J Cardiovasc Dis Res*. 2013;4(2):92-97. doi:10.1016/j.jcdr.2012.11.005 | Intervention |
| Checchi KD, Huybrechts KF, Avorn J, Kesselheim AS. Electronic medication packaging devices and medication adherence: A systematic review. *JAMA - J Am Med Assoc*. 2014;312(12):1237-1247. doi:10.1001/jama.2014.10059 | Intervention |
| Davidson M, Maccubbin D, Stepanavage M, Strony J, Musliner T. Striated muscle safety of ezetimibe/simvastin (Vytorin). *Am J Cardiol*. 2006;97(2):223-228. doi:10.1016/j.amjcard.2005.08.038 | No adherence-affecting factor |
| Deichmann RE, Morledge MD, Ulep R, Shaffer JP, Davies P, van Driel ML. A Metaanalysis of Interventions to Improve Adherence to Lipid-Lowering Medication. *Ochsner J*. 2016;16(3):230-237. | Intervention |
| Deshpande S, Quek RGW, Forbes CA, et al. A systematic review to assess adherence and persistence with statins. *Curr Med Res Opin*. 2017;33(4):769-778. doi:10.1080/03007995.2017.1281109 | No adherence-affecting factor |
| Dimatteo MR, Giordani PJ, Lepper HS, Thomas W. Patient Adherence and Medical Treatment Outcomes A Meta-Analysis Published by : Lippincott Williams & Wilkins Stable URL : http://www.jstor.org/stable/3768145. *Med Care*. 2002;40(9):794-811. doi:10.1097/01.MLR.0000024612.61915.2D | Not statins |
| Elley R, Gupta AK, Webster R, et al. The Efficacy and Tolerability of “Polypills”: Meta-Analysis of Randomised Controlled Trials. *PLoS One*. 2012;7(12):e52145. doi:10.1371/journal.pone.0052145 | No adherence-affecting factor |
| Eslami L, Merat S, Malekzadeh R, Aramin H. Statins for non-alcoholic fatty liver disease and non-alcoholic steatohepatitis ( Review ). *Cochran Collab*. 2013;(12). doi:10.1002/14651858.CD008623.pub2.www.cochranelibrary.com | No adherence-affecting factor |
| Fautrel B, Balso A, Riel P Van, et al. Influence of route of administration/drug formulation and other factors on adherence to treatment in rheumatoid arthritis (pain related) and dyslipidemia (non-pain related). *Curr Med Res Opin*. 2017;33(7):1231-1246. doi:10.1080/03007995.2017.1313209 | No adherence-affecting factor |
| Forbes CA, Deshpande S, Sorio-Vilela F, et al. A systematic literature review comparing methods for the measurement of patient persistence and adherence. *Curr Med Res Opin*. 2018;34(9):1613-1625. doi:10.1080/03007995.2018.1477747 | No adherence-affecting factor |
| Freeman MK, White W, Iranikhah M. Tablet splitting: a review of the clinical and economic outcomes and patient acceptance. Second part of a 2-part series. Part 1 was published in May 2012. *Consult Pharm*. 2012;27(6):421-430. doi:10.4140/TCP.n.2012.421 | No adherence-affecting factor |
| Gartlehner G, Chapman A, Strobelberger M, Thaler K. Differences in Efficacy and Safety of Pharmaceutical Treatments between Men and Women: An Umbrella Review. *PLoS One*. 2010;5(7). doi:doi:10.1371/journal.pone.0011895 | Intervention |
| Grant R, Meigs J. Overcoming barriers to evidence-based diabetes care. *Curr Diabetes Rev*. 2006;2(2):261-269. | Not statins |
| Griffiths RI, Keating NL, Bankhead CR. Quality of diabetes care in cancer: a systematic review. *Int J Qual Heal Care*. 2018:1-14. doi:10.1093/intqhc/mzy124 | Not statins |
| Gudzune KA, Monroe AK, Sharma R, Ranasinghe PD, Chelladurai Y, Robinson KA. Effectiveness of combination therapy with statin and another lipid-modifying agent compared with intensified statin monotherapy. *Ann Intern Med*. 2014;160(7):468-476. doi:10.7326/M13-2526 | No adherence-affecting factor |
| Hudson M, Richard H, Pilote L. Parabolas of medication use and discontinuation after myocardial infarction - are we clsing the treatment gap? *Pharmacoepidemiol Drug Saf*. 2007;16(May):773-785. doi:10.1002/pds.1414 | No adherence-affecting factor |
| Josan K, Sumit R. Majumdar, McAlister FA. The efficacy and safety of intensive statin therapy: a meta-analysis of randomized trials. *CMAJ*. 2008;178(5):576-584. doi:10.1503/cmaj.070675 | Intervention |
| Jörntén-Karlsson M, Pintat S, Molloy-Bland M, Berg S, Ahlqvist M. Patient-Centered Interventions to Improve Adherence to Statins: A Narrative Synthesis of Systematically Identified Studies. *Drugs*. 2016;76(15):1447-1465. doi:10.1007/s40265-016-0640-x | Intervention |
| Kinnear F, Perry R, Searle A, Hamilton-Shield JuP, Lithander FE. How do the experiences and beliefs of adults and children with heterozygous familial hypercholesterolaemia influence their adherence to treatment? A qualitative synthesis. *Syst Rev*. 2018;7(10):4-9. doi:doi.org/10.1186/s13643-018-0793-7 | Not a review |
| Laufs U, Scharnagl H, Halle M, Windler E, Endres M, März W. Treatment Options for Statin-Associated Muscle Symptoms. *Dtsch Arztebl Int*. 2015;112(44):748-755. doi:10.3238/arztebl.2015.0748 | Not a review |
| Lemstra M, Nwankwo C, Bird Y, Moraros J. Primary nonadherence to chronic disease medications: A meta-analysis. *Patient Prefer Adherence*. 2018;12:721-731. doi:10.2147/PPA.S161151 | No adherence-affecting factor |
| Logue J, AL-Ghibiwi H, Alamri AA, Preiss D. Systematic review of studies exploring reasons for statin non-adherence and of randomised controlled trials of interventions to improve adherence. *Atherosclerosis*. 2015;241(1):e52. doi:10.1016/j.atherosclerosis.2015.04.185 | Not a review |
| Machado M, Nassor N, Bajcar JM, Guzzo GC, Einarson TR. Sensitivity of patient outcomes to pharmacist interventions. Part III: Systematic review and meta-analysis in hyperlipidemia management. *Ann Pharmacother*. 2008;42(9):1195-1207. doi:10.1345/aph.1K618 | Intervention |
| Naci H, Brugts J, Ades T. Comparative tolerability and harms of individual statins : A study-level network meta-analysis of 246 955 participants from 135 randomized, controlled trials. *Circ Cardiovasc Qual Outcomes*. 2013;6(4):390-399. doi:10.1161/CIRCOUTCOMES.111.000071 | No adherence-affecting factor |
| Narayan SW, Nishtala PS. Discontinuation of Preventive Medicines in Older People with Limited Life Expectancy: A Systematic Review. *Drugs Aging*. 2017;34:767-776. doi:10.1007/s40266-017-0487-1 | No adherence-affecting factor |
| Njie GJ, Finnies RK, Archarya SD, et al. Reducing Medication Costs to Prevent Cardiovascular Disease: A Community Guide Systematic Review. *Prev Chronic Dis*. 2015;12(1):1-12. doi:10.5888/pcd12.150242 | Intervention |
| Ofori-Asenso R, Jakhu A, Zomer E, et al. Adherence and Persistence among Statin Users Aged 65 Years and Over: A Systematic Review and Meta-analysis. *Journals Gerontol - Ser A Biol Sci Med Sci*. 2018;73(6):813-819. doi:10.1093/gerona/glx169 | No adherence-affecting factor |
| Ofori-Asenso R, Zomer E, Curtis A, et al. Patterns and Predictors of Adherence to Statin Therapy Among Older Patients: Protocol for a Systematic Review. *JMIR Res Protoc*. 2017;6(3):e39. doi:10.2196/resprot.7195 | Not a review |
| Peterson AM, Takiya L, Finley R. Meta-analysis of interventions to improve drug adherence in patients with hyperlipidemia. *Pharmacotherapy*. 2003;23(1):80-87. doi:10.1592/phco.23.1.80.31921 | Intervention |
| Petrilla AA, Benner JS, Battleman DS, Tierce JC, Hazard EH. Evidence-based interventions to improve patient compliance with antihypertensive and lipid-lowering medications. *Int J Clin Pract*. 2005;59(12):1441-1451. doi:10.1111/j.1368-5031.2005.00704.x | Intervention |
| Rash JA, Campbell DJT, Tonelli M, Campbell TS. A systematic review of interventions to improve adherence to statin medication: What do we know about what works? *Prev Med (Baltim)*. 2016;90(2016):155-169. doi:10.1016/j.ypmed.2016.07.006 | Intervention |
| Reindl EK, Wright BM, Wargo KA. Alternate-day statin therapy for the treatment of hyperlipidemia. *Ann Pharmacother*. 2010;44(9):1459-1470. doi:10.1345/aph.1M571 | No adherence-affecting factor |
| Schedlbauer A, Davies P, Fahey T. Interventions to improve adherence to lipid lowering medication. *Cochrane Database Syst Rev*. 2010;3(3):CD004371. doi:10.1002/14651858.CD004371.pub3.www.cochranelibrary.com | Intervention |
| Schedlbauer A, Schroeder K, Fahey T. How can adherence to lipid-lowering medication be improved? A systematic review of randomized controlled trials. *Fam Pract*. 2007;24(4):380-387. doi:10.1093/fampra/cmm030 | Intervention |
| Shao K, Tang Y, Zhou D, Huang S. *Comparison of the Safety of Statin Monotherapy and Coadministration with Fenofibrate in Patients with Mixed Hyperlipidemia: A Meta-Analysis*. Vol 9.; 2016. www.ijcem.com/. Accessed December 19, 2019. | No adherence-affecting factor |
| Shroufi A, Powles JW. Adherence and chemoprevention in major cardiovascular disease: A simulation study of the benefits of additional use of statins. *J Epidemiol Community Health*. 2010;64(2):109-113. doi:10.1136/jech.2009.091033 | No adherence-affecting factor |
| Tsuyuki RT, Bungard TJ. Poor adherence with hypolipidemic drugs: A lost opportunity. *Pharmacotherapy*. 2001;21(5):576-582. doi:10.1592/phco.21.6.576.34541 | No adherence-affecting factor |
| Van Driel ML, Morledge MD, Ulep R, Schaffer J, Davies P, Deichmann R. Interventions to improve adherence to lipid-lowering medication (Review). *Cochrane Collab*. 2016;(12). doi:10.1002/14651858.CD004371.pub4.www.cochranelibrary.com | Intervention |
| Viswanathan M, Golin CE, Jones CD, et al. *Closing the Quality Gap: Revisting the Stat of the Science (Vol. 4: Medication Adherence Interventions: Comparative Effectiveness)*. Evid Rep Technol Assess; 2012. | Intervention |
| Webster R, Patel A, Selak V, et al. Effectiveness of fixed dose combination medication ('polypills’) compared with usual care in patients with cardiovascular disease or at high risk: A prospective, individual patient data meta-analysis of 3140 patients in six countries. *Int J Cardiol*. 2016;205:147-156. doi:10.1016/j.ijcard.2015.12.015 | Not a review |
| Yan YL, Qiu B, Hu LJ, et al. Efficacy and safety evaluation of intensive statin therapy in older patients with coronary heart disease: a systematic review and meta-analysis. doi:10.1007/s00228-013-1570-0 | Intervention |
| Zheng W, Yang W, Zhang Q-E, et al. Meta-analysis of the Efficacy and Safety of Adjunctive Rosuvastatin for Dyslipidemia in Patients with Schizophrenia •SYSTEMATIC REVIEW AND META-ANALYSIS•. *Shanghai Arch Psychiatry*. 2018;30(1):4-11. doi:10.11919/j.issn.1002-0829.217156 | No adherence-affecting factor |
